# Supplementary material for: Leveraging Artificial Intelligence for Effective Breast Cancer Management in Low-Resource Centers: A Pilot Project of Tnm Staging Machine
Source: Research Square preprint supplement (doi:10.21203/rs.3.rs-6718906/v1), 2025-06-26
Supplement: Supplementary file 1 [file f17c3a58c2383e41c7ac4b76.docx]

**SUPPLEMENTARY FILE**

Supplementary Table 1: Real-World Dataset for Model Validation (TNM Features and Predicted Stages)

| Index | T_coded | mobile | fix_mat | supra | Met | skin_chest | stage |
| --- | --- | --- | --- | --- | --- | --- | --- |
| 0 | 1 | 0 | 0 | 0 | 0 | 0 | 1A |
| 1 | 2 | 0 | 1 | 0 | 0 | 1 | 3B |
| 2 | 3 | 0 | 0 | 0 | 0 | 0 | 2B |
| 3 | 2 | 0 | 1 | 0 | 1 | 1 | four |
| 4 | 3 | 0 | 1 | 0 | 1 | 1 | four |
| 5 | 3 | 0 | 1 | 0 | 0 | 1 | 3B |
| 6 | 1 | 0 | 0 | 0 | 0 | 0 | 1A |
| 7 | 3 | 0 | 1 | 0 | 1 | 1 | four |
| 8 | 2 | 0 | 1 | 0 | 1 | 1 | four |
| 9 | 2 | 1 | 0 | 0 | 0 | 0 | 2B |
| 10 | 2 | 1 | 0 | 0 | 0 | 0 | 2B |
| 11 | 3 | 0 | 1 | 0 | 1 | 1 | four |
| 12 | 2 | 1 | 0 | 0 | 0 | 0 | 2B |
| 13 | 2 | 0 | 1 | 0 | 1 | 1 | four |
| 14 | 3 | 0 | 1 | 0 | 0 | 1 | 3B |
| 15 | 2 | 0 | 1 | 0 | 1 | 1 | four |
| 16 | 3 | 0 | 1 | 0 | 1 | 1 | four |
| 17 | 2 | 0 | 0 | 0 | 0 | 0 | 2A |
| 18 | 3 | 0 | 1 | 0 | 1 | 1 | four |
| 19 | 2 | 0 | 1 | 0 | 1 | 0 | four |
| 20 | 1 | 1 | 0 | 0 | 0 | 0 | 2A |
| 21 | 2 | 1 | 0 | 0 | 0 | 0 | 2B |
| 22 | 2 | 1 | 0 | 0 | 0 | 0 | 2B |
| 23 | 3 | 0 | 1 | 0 | 1 | 1 | four |
| 24 | 3 | 0 | 1 | 0 | 1 | 1 | four |
| 25 | 2 | 0 | 1 | 0 | 1 | 1 | four |
| 26 | 2 | 1 | 0 | 0 | 0 | 0 | 2B |
| 27 | 2 | 0 | 0 | 0 | 0 | 1 | 3B |
| 28 | 3 | 1 | 0 | 1 | 0 | 0 | 3C |
| 29 | 3 | 0 | 1 | 0 | 1 | 1 | four |
| 30 | 2 | 0 | 1 | 0 | 0 | 0 | 3A |
| 31 | 1 | 0 | 1 | 0 | 0 | 0 | 3A |
| 32 | 3 | 0 | 1 | 0 | 1 | 1 | four |
| 33 | 3 | 1 | 0 | 1 | 0 | 0 | 3C |
| 34 | 3 | 1 | 0 | 0 | 0 | 1 | 3B |
| 35 | 3 | 0 | 1 | 0 | 1 | 1 | four |
| 36 | 3 | 0 | 1 | 0 | 0 | 1 | 3B |
| 37 | 2 | 1 | 0 | 0 | 0 | 0 | 2B |
| 38 | 3 | 0 | 1 | 0 | 1 | 1 | four |
